# Supplementary material
Source: PubMed Central journal article supplement (PMC6389444)
Supplement: NIHMS1006728-supplement-Supplemental_Figures.pdf [file NIHMS1006728-supplement-Supplemental_Figures.pdf]

# **Systematic Dissection of Sequence Elements Controlling $\sigma$ 70 Promoters Using a Genomically-Encoded Multiplexed Reporter Assay in *E. coli***

## **Authors and Affiliations:**

Guillaume Urtecho<sup>1</sup>, Arielle D. Tripp<sup>2</sup>, Kimberly D. Insigne<sup>3</sup>, Hwangbeom Kim<sup>4</sup>, and Sriram Kosuri<sup>4,5\*</sup>

<sup>1</sup> Molecular Biology Interdepartmental Doctoral Program, University of California, Los Angeles, CA, 90095, USA

<sup>2</sup> Department of Molecular, Cell, and Developmental Biology, University of California, Los Angeles, CA, 90095, USA

<sup>3</sup> Bioinformatics Interdepartmental Graduate Program, University of California, Los Angeles, CA 90095, USA

<sup>4</sup> Department of Chemistry and Biochemistry, University of California, Los Angeles, CA 90095, USA

<sup>5</sup> UCLA-DOE Institute for Genomics and Proteomics, Molecular Biology Institute, Quantitative and Computational Biology Institute, Eli and Edythe Broad Center of Regenerative Medicine and Stem Cell Research, Jonsson Comprehensive Cancer Center, University of California, Los Angeles, CA 90095, USA

\*To whom correspondence should be addressed. Tel: +1 310 825 8931; Email: [sri@ucla.edu](mailto:sri@ucla.edu)

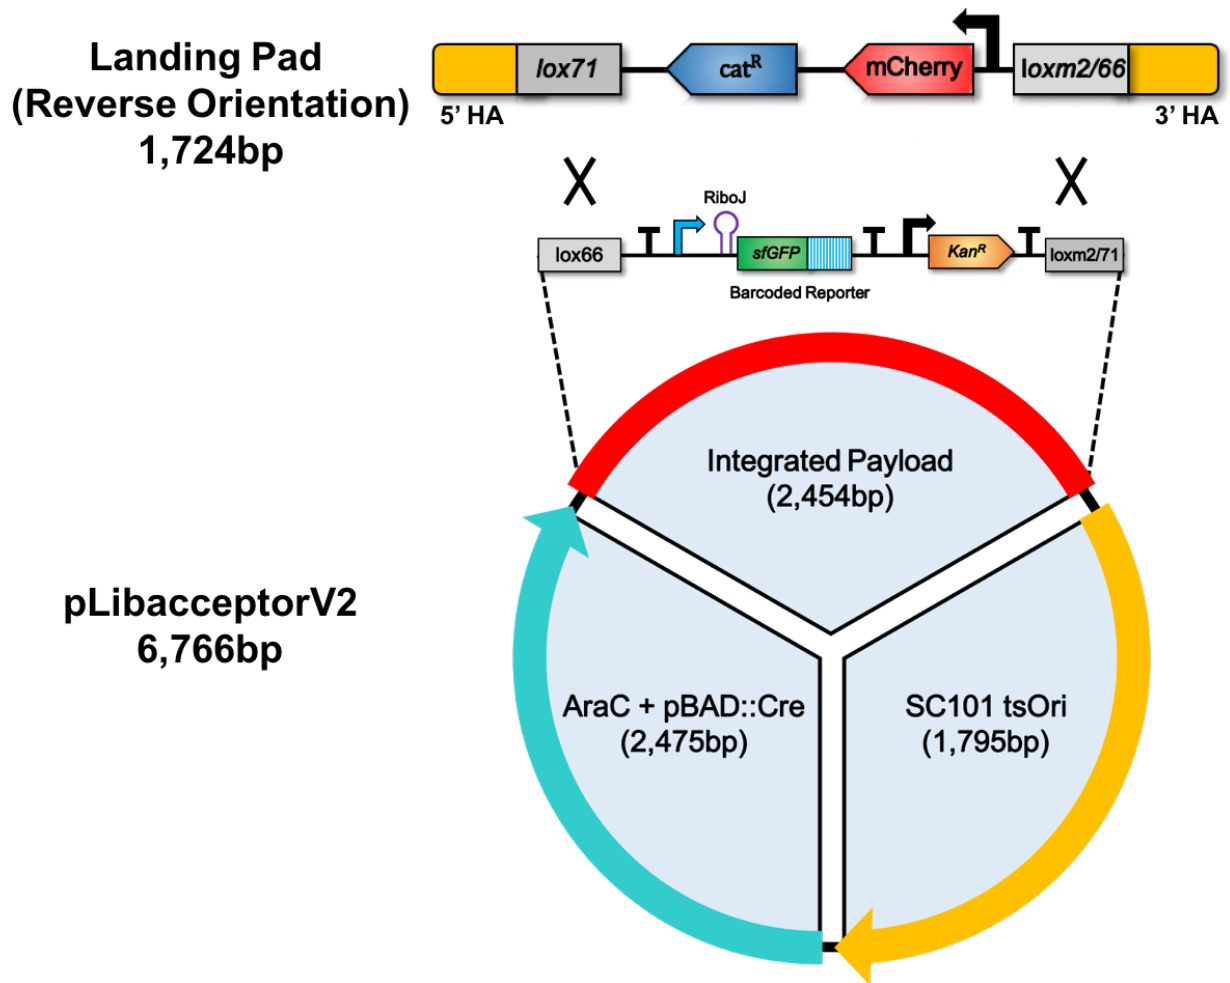

**Figure S1. RMCE components.** An example of a reversed-orientation landing pad (top) showing the *mCherry* and *cat<sup>R</sup>* (chloramphenicol resistance) bicistronic operon. Below that we show the final donor plasmid containing the promoter reporter construct and the boundaries of the cassette exchange. Components of the original integration vector, pLibacceptorV2 are described in the methods. Abbreviations: homology arm (HA).

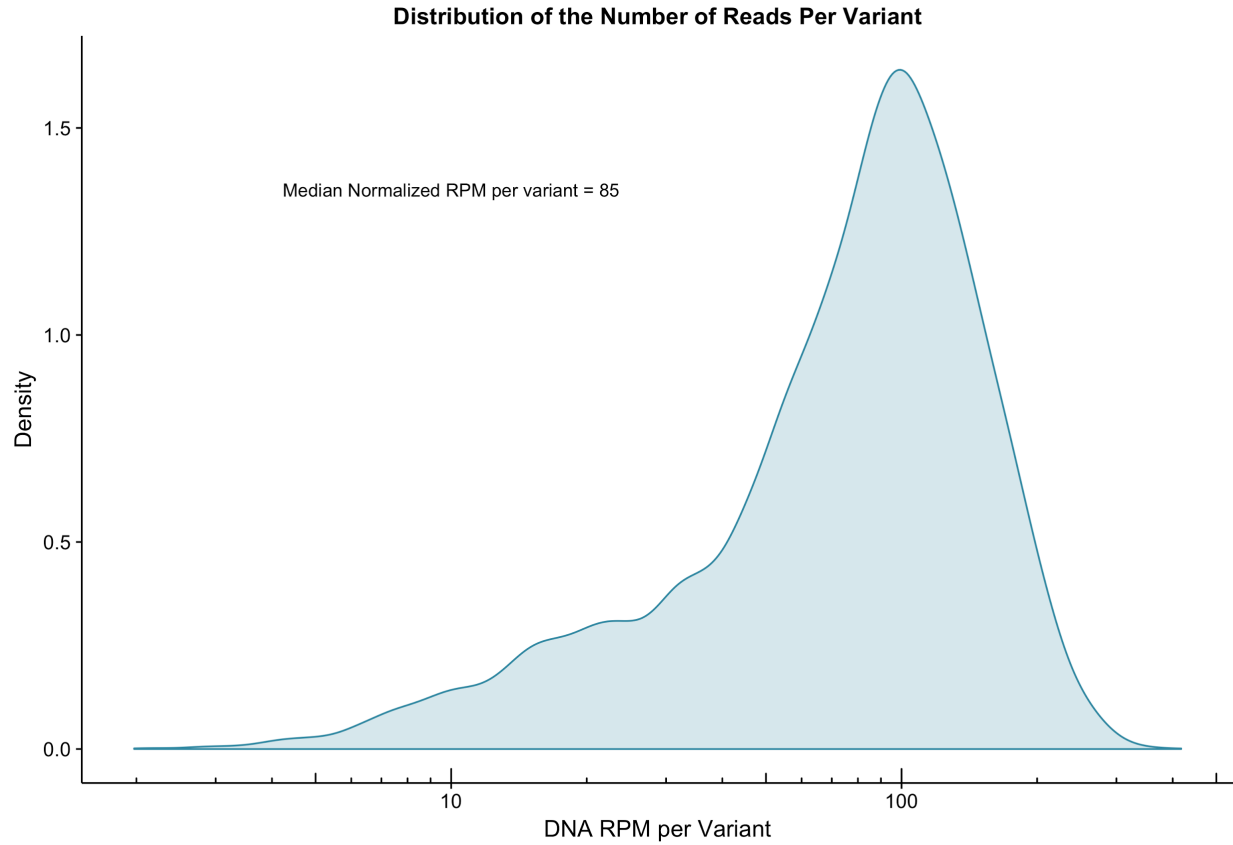

**Figure S2. DNA sequencing reads are well distributed amongst integrated variants.** Here we plot the distribution of normalized DNA reads per variant. DNA read counts for each barcode were converted to reads per million (RPM) and aggregated for each mapped variant.

No UP element

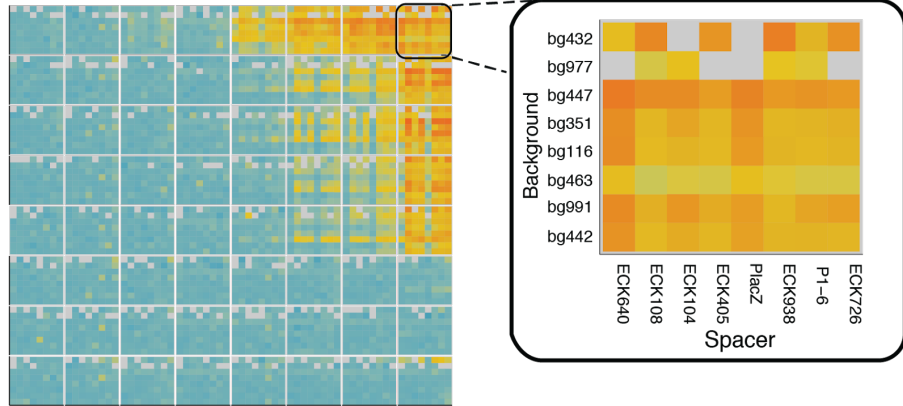

136x UP element

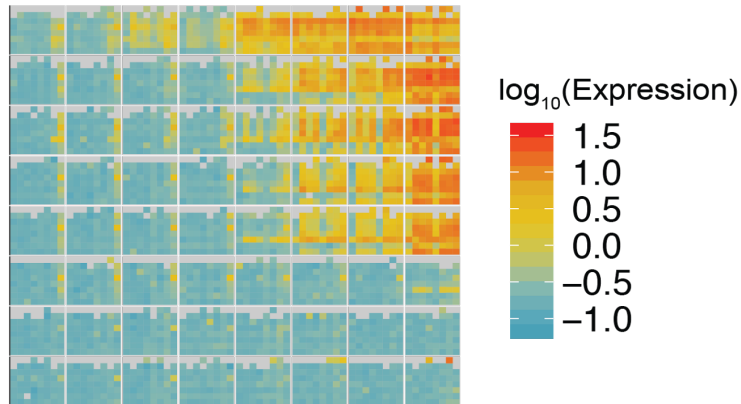

326x UP element

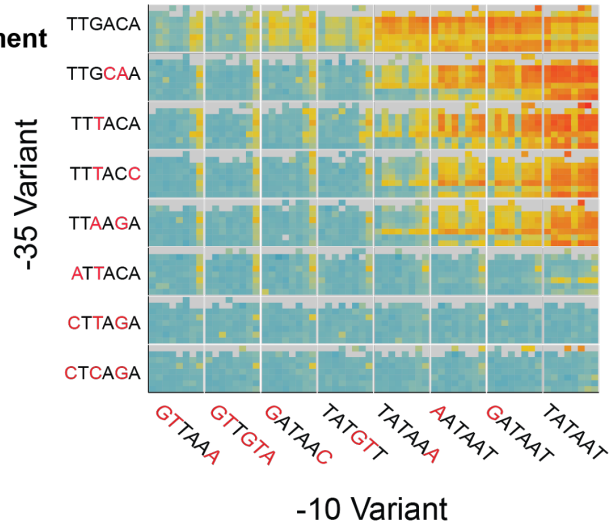

**Figure S3. Global trends of promoter expression are consistent between UP element variants.** As in Figure 3B, we show that promoter expression increases as -10 and -35 sequences approach the consensus. We include the two backgrounds omitted from Figure 3B (bg432 and bg977) that show reduced mappings possibly due to inefficient oligo synthesis or amplification with these backgrounds. Promoter variants for which we could not detect more than four barcodes were omitted from our analysis and are displayed as grey squares.

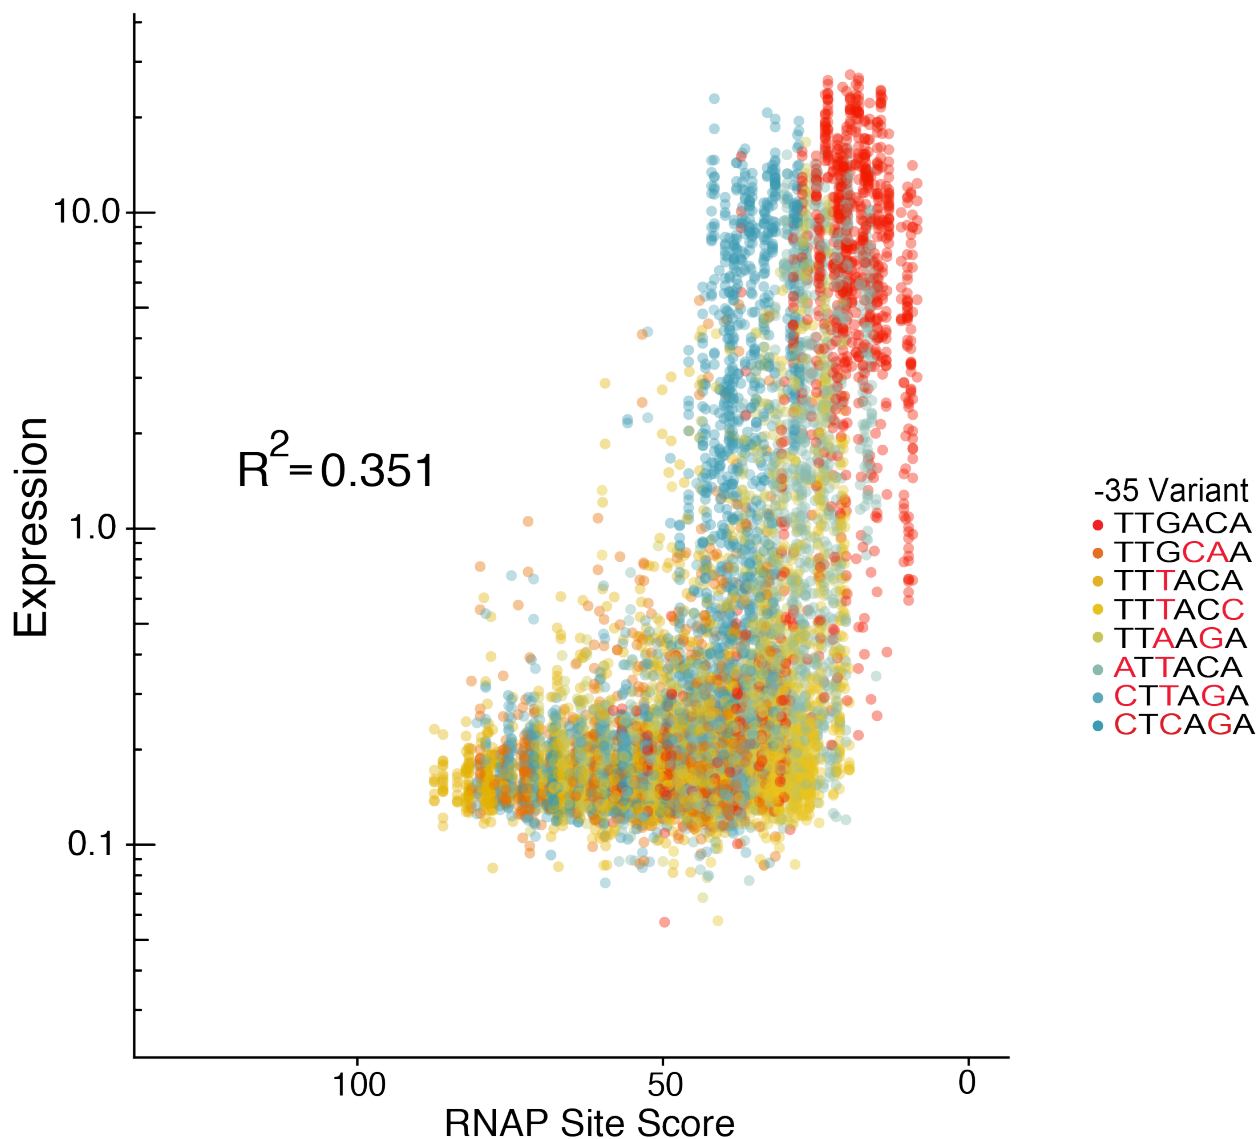

**Figure S4. Assessing external binding energy scores against expression.** We used a previously described binding energy matrix model of RNAP to the lac promoter to score our minimal library. This model experimentally determined an energy matrix model representing the interaction of RNAP and a promoter sequence of interest as a proxy for expression.

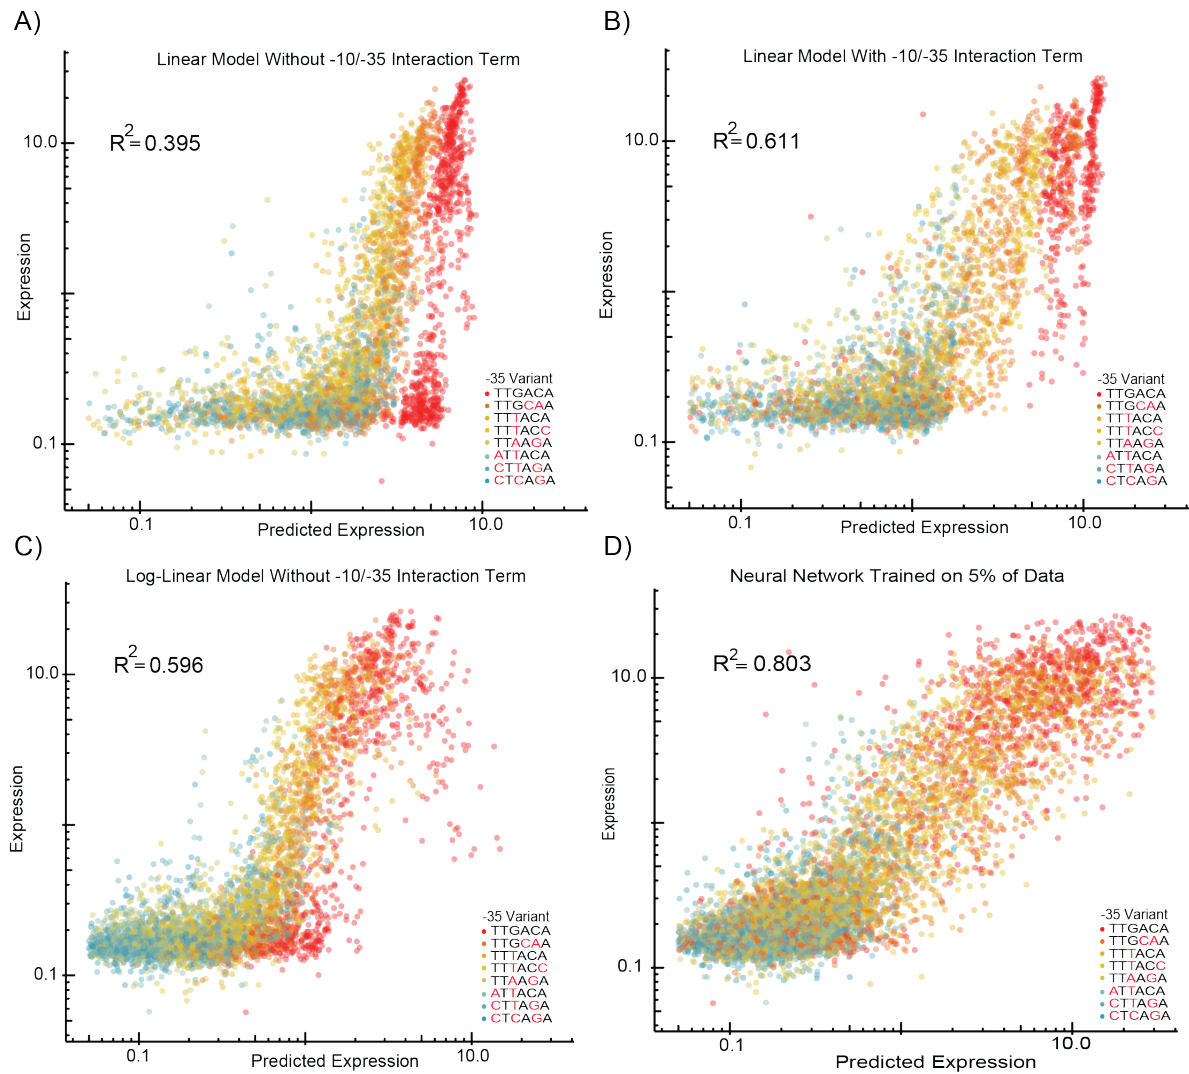

**Figure S5. Alternative models to fit experimental data.** A) We implemented a basic linear model trained without a -10/-35 interaction term to predict promoter expression. B) Inclusion of the interaction term increases the predictive capacity of linear models. C) Training models on log-transformed data captures the multiplicative effects of sequence elements thereby increasing performance. D) The neural network performs better than any linear model even when trained on as little as 5% of the data. All linear models in this figure were trained on 50% of the data and tested on the remaining data.

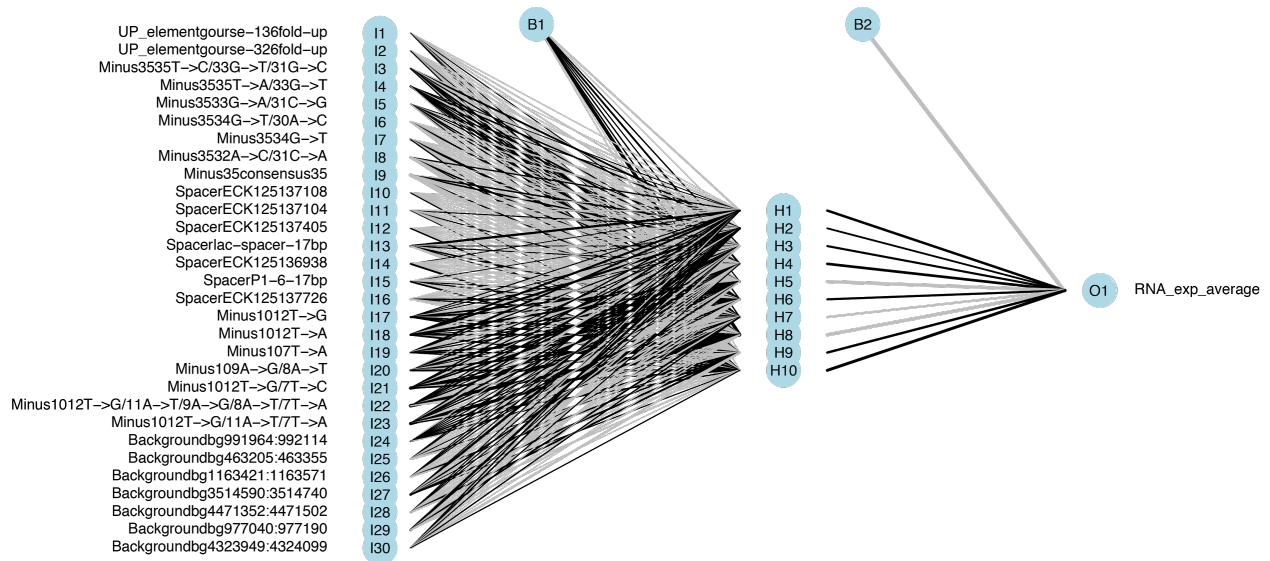

**Figure S6. Neural network schematic.** The neural network is comprised of an input layer containing 30 nodes, each representing one of the possible Backgrounds, UP elements, -35 elements, spacers, or -10 elements, and a single hidden layer containing 10 nodes. This is a feed-forward network that implements a sigmoid activation function in the hidden layer and a linear output function. Respectively, nodes I1-30, H1-10, B1-2, and O1 represent the input, hidden, bias, and output nodes. The value of the weights connecting each node are represented by their thickness.

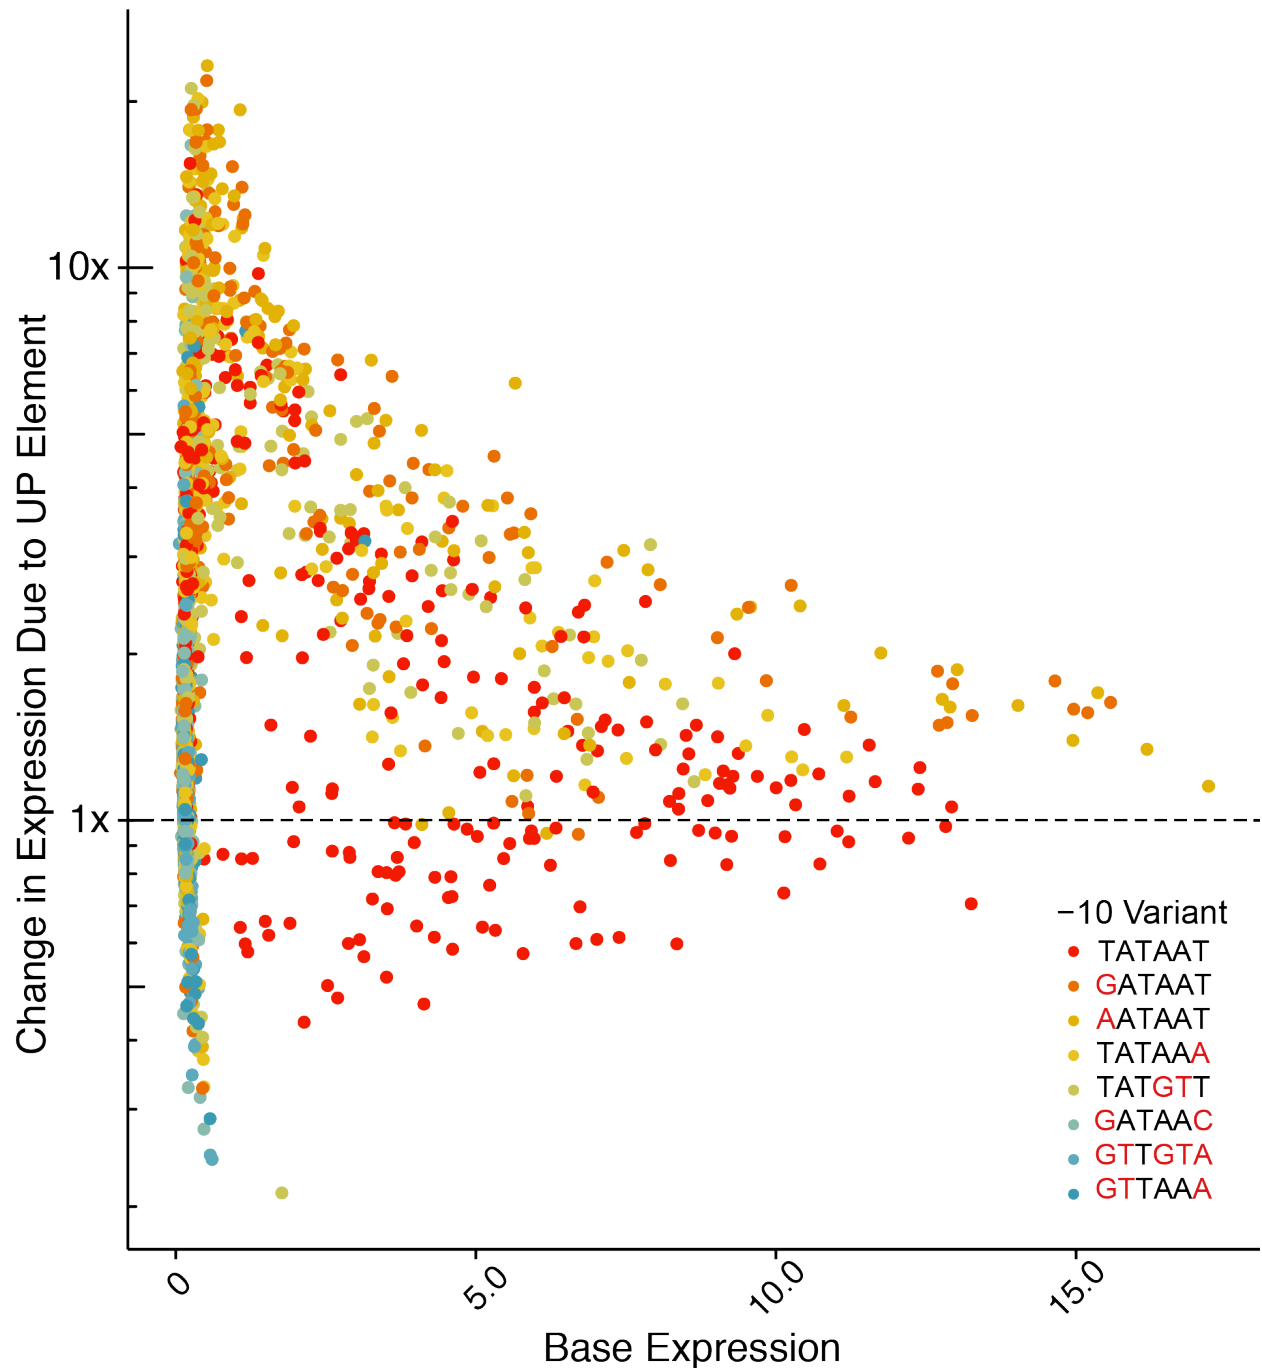

**Figure S7. Addition of the consensus UP element can negatively impact expression of promoters containing a consensus -10 element.** We determined the change in expression due to the consensus UP element by dividing the expression of promoters with the consensus UP by their expression without an UP element.



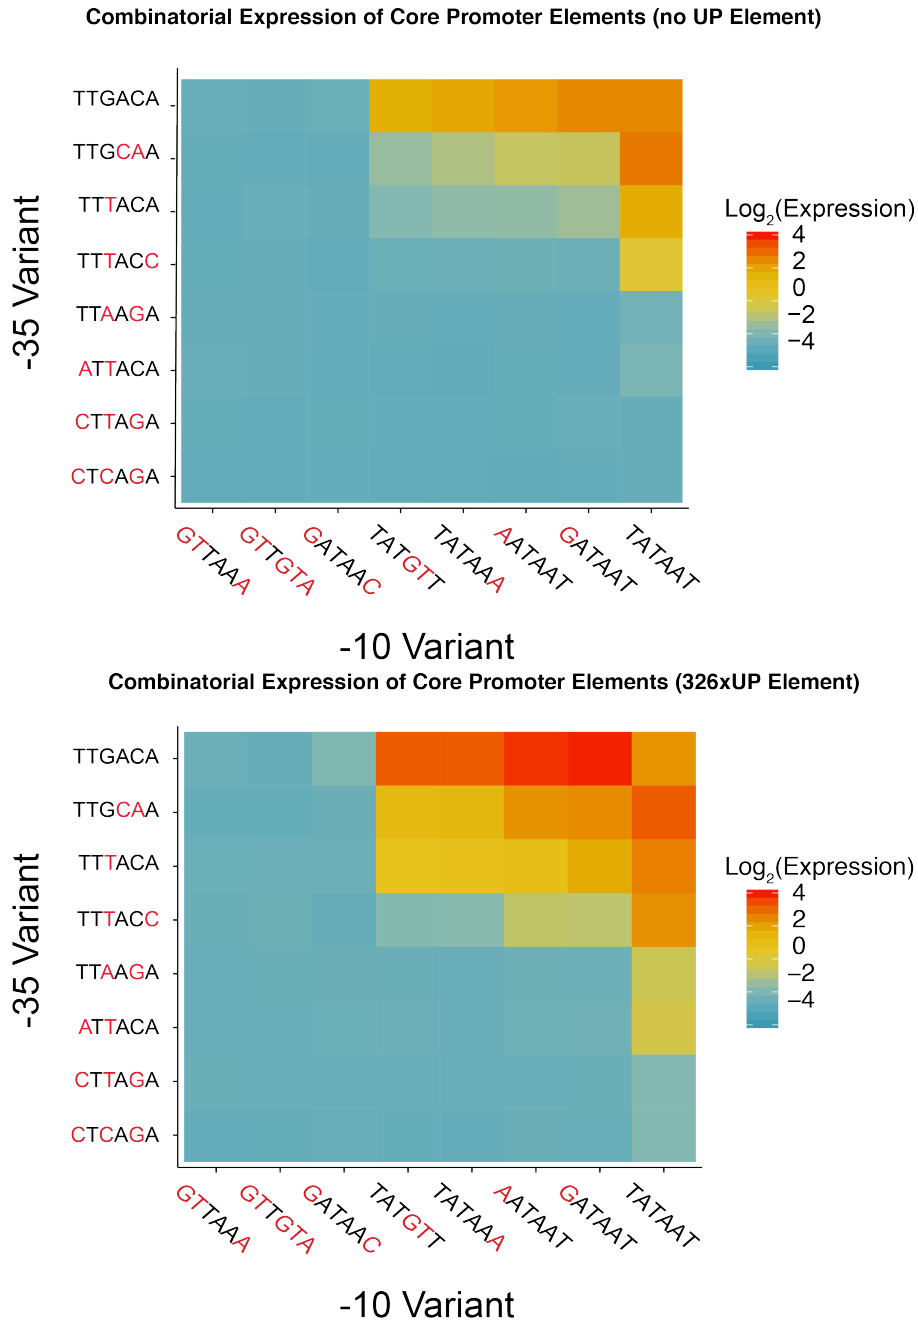

**Figure S8. Promoters with consensus -10 but inactive -35 elements are rescued by consensus UP element.** The -10 (horizontal) and -35 (vertical) elements are ordered by increasing median expression amongst promoters with the indicated variant. The two lowest expressing -35 variants are inactive unless the consensus -10 and UP elements are present.

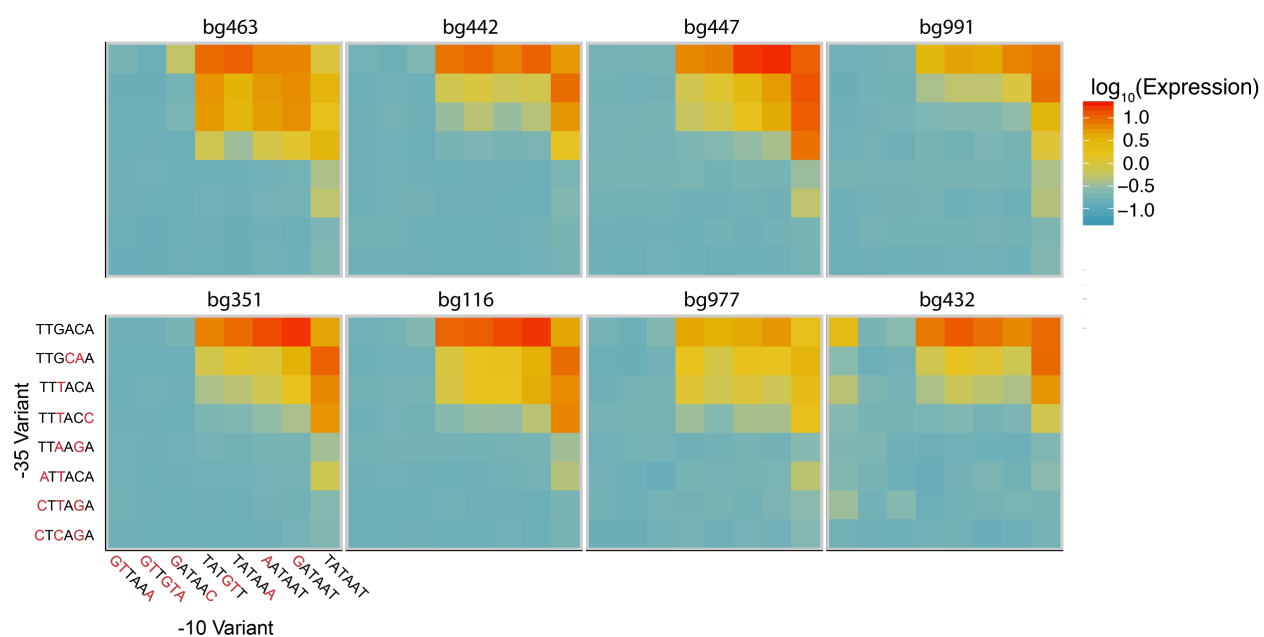

**Figure S9. The activity of the core promoter is dependent on local sequence context.** Combinations of -10 and -35 elements have variable expression between backgrounds. We separated the library by background and determined the median expression of all promoters with each -10 and -35 combination.

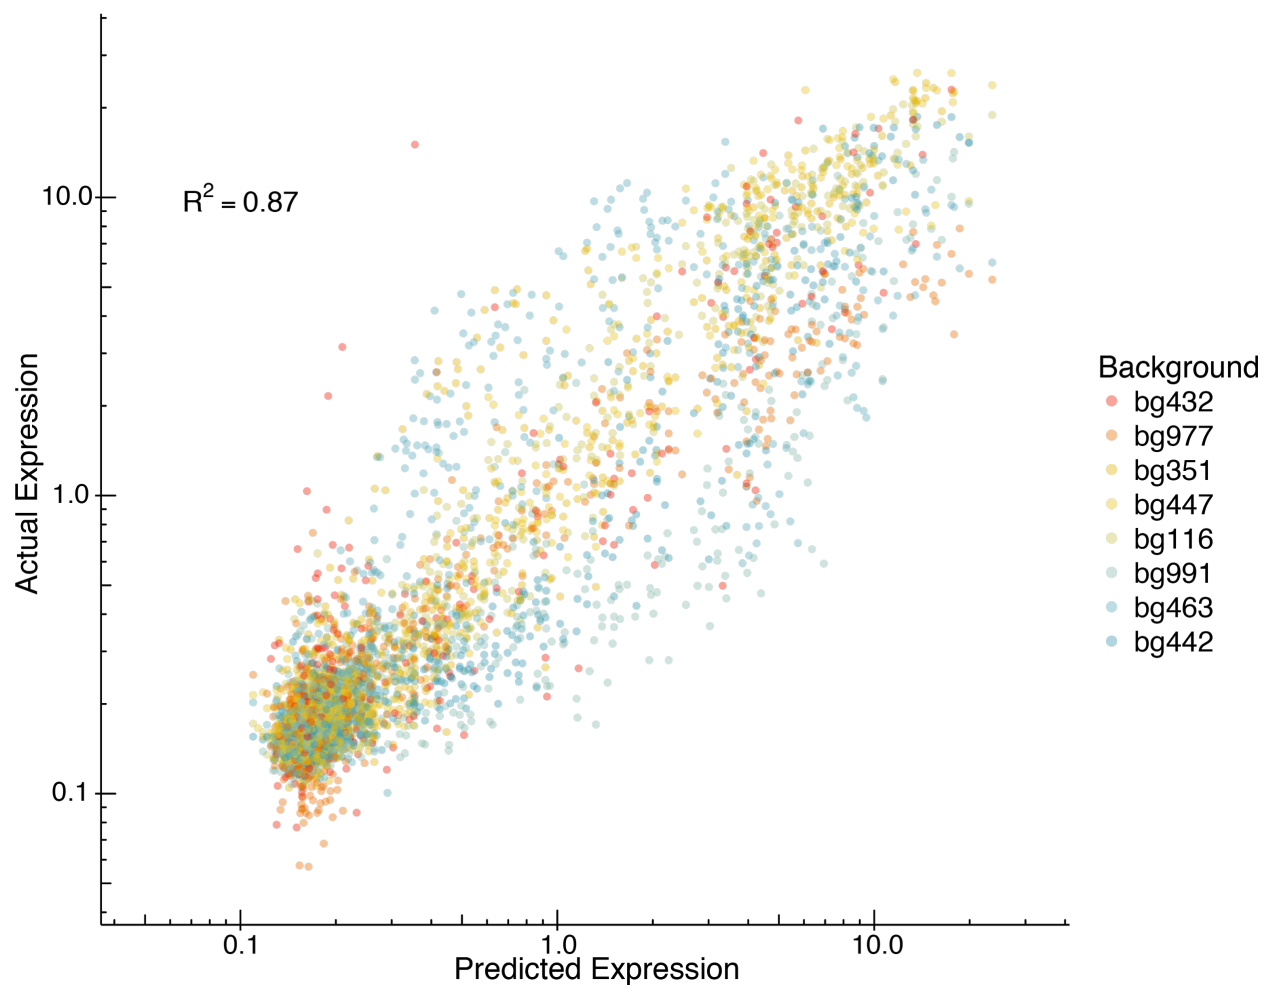

**Figure S10. Background sequences are an essential consideration when predicting promoter expression.** Here we show the performance of the neural network (as in Figure 4C) trained on all sequence elements aside from the background sequence. The coefficient of determination between predicted and actual expression drops from 0.955 to 0.87 when the background is not taken into account.

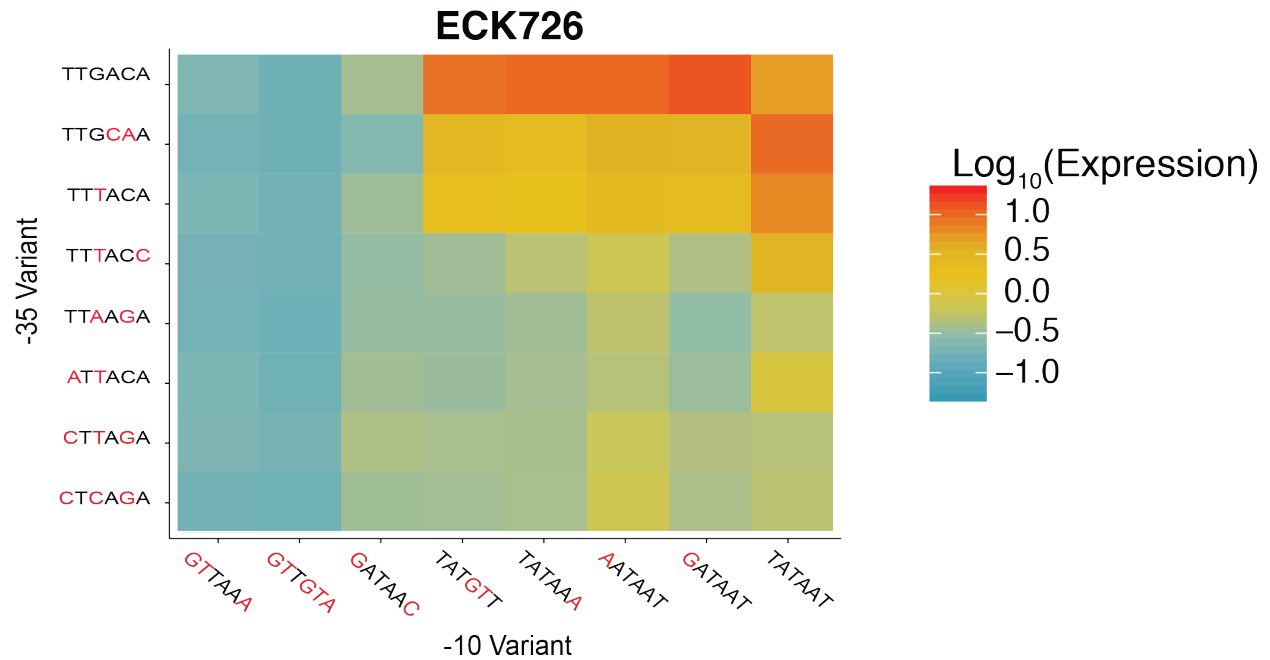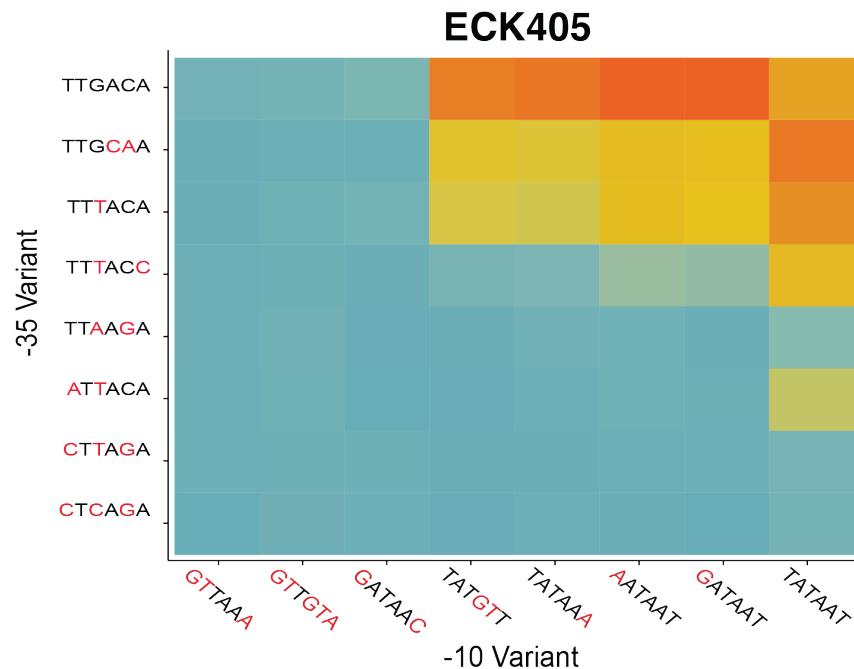

**Figure S11. Spacer variant ECK726 permits transcription from promoters with weak core elements.** Here we show the median expression of each core promoter combination amongst promoters with spacer variants ECK726 and ECK405, the spacer variant with the strongest median expression. Element variants are arranged in order of median expression amongst promoters containing the indicated variant.

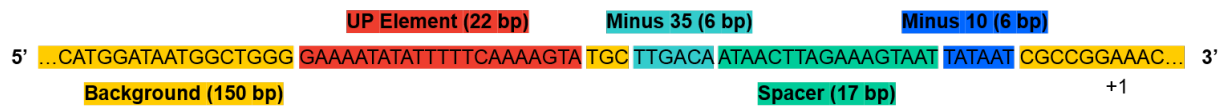

**Figure S12. Construction of  $\sigma 70$  variant library.** Here we show an example of a constructed variant with its components highlighted. Each variant is composed of a base background sequence in which one of each UP element, Minus 35, Spacer, and Minus 10 were superimposed at their respective positions. Variants without UP Elements maintained their relevant background sequence. See methods for further details.

| UP Element | Sequence                                                                                                                                                       |                                   |                                                                                                                                                               | Notes                             |
|------------|----------------------------------------------------------------------------------------------------------------------------------------------------------------|-----------------------------------|---------------------------------------------------------------------------------------------------------------------------------------------------------------|-----------------------------------|
|            | GAAAAATATATTTTTCAAAGTA                                                                                                                                         |                                   |                                                                                                                                                               | 136-fold increase                 |
|            | GGAAAAATTTTTTTCAAAGTA                                                                                                                                          |                                   |                                                                                                                                                               | 326-fold increase                 |
| -35        | Sequence                                                                                                                                                       | Mismatched Bases                  | Sequence                                                                                                                                                      | Mismatched Bases                  |
|            | TTGACA                                                                                                                                                         | 0                                 | TTAAGA                                                                                                                                                        | 2                                 |
|            | TTTACA                                                                                                                                                         | 1                                 | TTGCAA                                                                                                                                                        | 2                                 |
|            | ATTACA                                                                                                                                                         | 2                                 | CTCAGA                                                                                                                                                        | 3                                 |
|            | TTTACC                                                                                                                                                         | 2                                 | CCTAGA                                                                                                                                                        | 3                                 |
| -10        | Sequence                                                                                                                                                       | Mismatched Bases                  | Sequence                                                                                                                                                      | Mismatched Bases                  |
|            | TATAAT                                                                                                                                                         | 0                                 | GATAAC                                                                                                                                                        | 2                                 |
|            | AATAAT                                                                                                                                                         | 1                                 | TATGTT                                                                                                                                                        | 2                                 |
|            | GATAAT                                                                                                                                                         | 1                                 | GTTAAA                                                                                                                                                        | 3                                 |
|            | TATAAA                                                                                                                                                         | 1                                 | GTTGTA                                                                                                                                                        | 5                                 |
| Spacer     | Sequence                                                                                                                                                       | Label                             | Sequence                                                                                                                                                      | Label                             |
|            | AAAACCTATTTTATTTT                                                                                                                                              | ECK125137405 spacer               | TCGCGCATGATCGAAAG                                                                                                                                             | ECK125137104 spacer               |
|            | AGCACGAAAAATGGAAGT                                                                                                                                             | ECK125137108 spacer               | TGGCTGAATGGTCTGTC                                                                                                                                             | ECK125137640 spacer               |
|            | ATAACTTAGAAAGTAAT                                                                                                                                              | ECK125136938 spacer               | CTTTATGCTTCGGCTCG                                                                                                                                             | <i>lac</i> spacer                 |
|            | TTTCATTAGCGAGTAT                                                                                                                                               | ECK125137726 spacer               | CTTTATGCTTTTATGTT                                                                                                                                             | P1-6 spacer                       |
| Background | Sequence                                                                                                                                                       | Source                            | Sequence                                                                                                                                                      | Source                            |
|            | TTGCGGTTTTTCGGTTCAATCACGCCTGCTGACGAGCTGGGCG<br>CGTAGTGGACGGACGTTCAAGCGTTTGCCTTTTCGCGGTGCACG<br>CGATGCATTGCCATTGCGAACAGCGCAACCGTTGCGGGTTCAGT<br>CGGCAACGTGGAATT | Genomic region<br>3514590:3514740 | CTGGAAGAAAACGCCAAAAAAGAAGGTGTGAATAGCACCGAATCTGG<br>CCTGCAATTCGCGGTGATCAACAGGGTGAAGCGCAATTCGCGCAC<br>GTACCGAACCGGTTCTGTTCATTACACCGGTAACCTGATCGACGGC<br>ACCGTGT | Genomic region<br>4427287:4427437 |
|            | ACTGGACGCGGAAGAGCGTGAATACTGGCGCATCCGCTGGTGG<br>GAGGCGTATTCTTTACGCGTAACATATCATGATCCTGCCAGTT<br>ACGTGAACCTGGTGCAGATCCGCGCAGCTTCGCGCAATCGTCT<br>GGTGGTGGCGTTGTA   | Genomic region<br>1163421:1163571 | AGCGCTTTTAGCGGACGAGCTGAGTAAACAAAACCCAGACATCATG<br>GATAATGGCTGGGCTTAATTGAGCGTAGTCGGTTATGCGCAACGC<br>GCCATCAATGGTATGATCGCGCCGTAACAAAACCTGCTTCTGGCC<br>CTGCTAAC  | Genomic region<br>4471352:4471502 |
|            | GCGCGTAACGCCCTTATCCGGCTACGGAGGTCGGGAAATTTG<br>TAGGCTGATAAGACGCGCAAGCGTCCATCAGCAGTCGGCAACC<br>ATTGCCGATGCGCGTAACGCCCTTATCCGGCTACGGAGGTCG<br>CGGAAATTTGTAAGC     | Genomic region<br>4323949:4324099 | TTAGCAGGCTTATCAGCTGGTGGTGAATCAACGGCCACTGGCG<br>CGTAACGAGCGTGGGATGTCCTCGCAACTATTGCGCGAAGGGG<br>TCGATCAGCGTCACTGGCAGAGCTTCAACCGCTCGGATGCGA<br>TTAAGCGAAC        | Genomic region<br>977040:977190   |
|            | GTAAACAACAGGAGAAAAACAGTATGAAACACGGAATTAAGCAC<br>TGCTCATTACCTGTCCCTGGCTGTGCGGAAATGTCTCATAGCGC<br>GCTGCGGACAGCTTCTGTGGCGAAACGACGGCGGTAGAAACCA<br>AAGCGGAAGCTCT   | Genomic region<br>463205:463355   | CCTGGTTTTCTCGCTTTTGGTAAACGCATCTGGCTGATGTGCTGGT<br>GAGCAAGCAGTCCACGAAGCAACAATATGACTGATGCGCTGGCGG<br>CGTTTTCTGGCGGTTGCGCGACAGCTGCTTGCCTGTACCGCGCTG              | Genomic region<br>991964:992114   |

**Table S1. Minimal library design organized by sequence elements.** The library consisted on 12,288 unique  $\sigma 70$  promoters that consisted of a set of all possible combinations for the following sequence elements: three UP elements, eight -35 regions, eight spacer sequences, eight -10 regions, and eight background sequences.

| Sample                          | Number of Reads |
|---------------------------------|-----------------|
| Biological Replicate #1-1 (DNA) | 31,966,245      |
| Biological Replicate #1-2 (DNA) | 25,945,822      |
| Biological Replicate #2 (DNA)   | 17,009,806      |
| Biological Replicate #3 (DNA)   | 14,196,597      |
| Biological Replicate #1-1 (RNA) | 36,559,121      |
| Biological Replicate #1-2 (RNA) | 33,731,384      |
| Biological Replicate #2 (RNA)   | 15,462,030      |
| Biological Replicate #3 (RNA)   | 16,449,240      |

**Table S2. Number of reads acquired per barcode sequencing run.** Technical replicates are labeled as #(Biological Replicate)-(Technical Replicate).

| Primer | Sequence (5' to 3')                                                            |
|--------|--------------------------------------------------------------------------------|
| GU59   | CATGTTGTCCACTCCAATCGGTGATGGTCCTG                                               |
| GU60   | GTAATAGCTAAATCCCACCCGATGCCTGCAGG                                               |
| GU61   | CAAGCAGAAGACGGCATAACGAGAT ACTGTG<br>CATGTTGTCCACTCCAATCG                       |
| GU62   | CAAGCAGAAGACGGCATAACGAGAT AGCCAT<br>CATGTTGTCCACTCCAATCG                       |
| GU63   | CAAGCAGAAGACGGCATAACGAGAT ATCTCG<br>CATGTTGTCCACTCCAATCG                       |
| GU64   | CAAGCAGAAGACGGCATAACGAGAT CAGTGT<br>CATGTTGTCCACTCCAATCG                       |
| GU70   | AATGATACGGCGACCACCGAGATCTACACGTAATAGCTAAATCCCACCCG<br>ATGC                     |
| GU72   | ACCTGTAATTCCAAGCGTCTCGAG                                                       |
| GU73   | TCGTATCCCTGCAGGNNNNNNNNNNNNNNNNNNNNNNNGCATGTGAGACCGG<br>ATGCTAACTAAACACCGCTAGC |
| GU79   | CGTGCATAGTGCCATGTTATCCCTGAAGTCGAG                                              |
| GU82   | CAAGCAGAAGACGGCATAACGAGATATCTCGCGTGCATAGTGCCATGTTAT<br>C                       |
| GU83   | CAAGCAGAAGACGGCATAACGAGATAGCCATCGTGCATAGTGCCATGTTAT<br>C                       |
| GU101  | AATGATACGGCGACCACCGAGATCTACACGTAATAGCTAAATCCCACCCG<br>ATGCCTGCAGG              |
| GU102  | AATGATACGGCGACCACCGAGATCTACAC                                                  |
| GU116  | GGATGCTAACTAAACACCGCTAGC                                                       |

**Table S3. Primers used in this study.**
